# Supplementary material for: Unexpected Role of the Steroid-Deficiency Protein Ecdysoneless in Pre-mRNA Splicing
Source: PubMed Central journal article supplement (PMC3983036; doi:10.1371/journal.pgen.1004287), 2014-04-10

**Fig. S2**

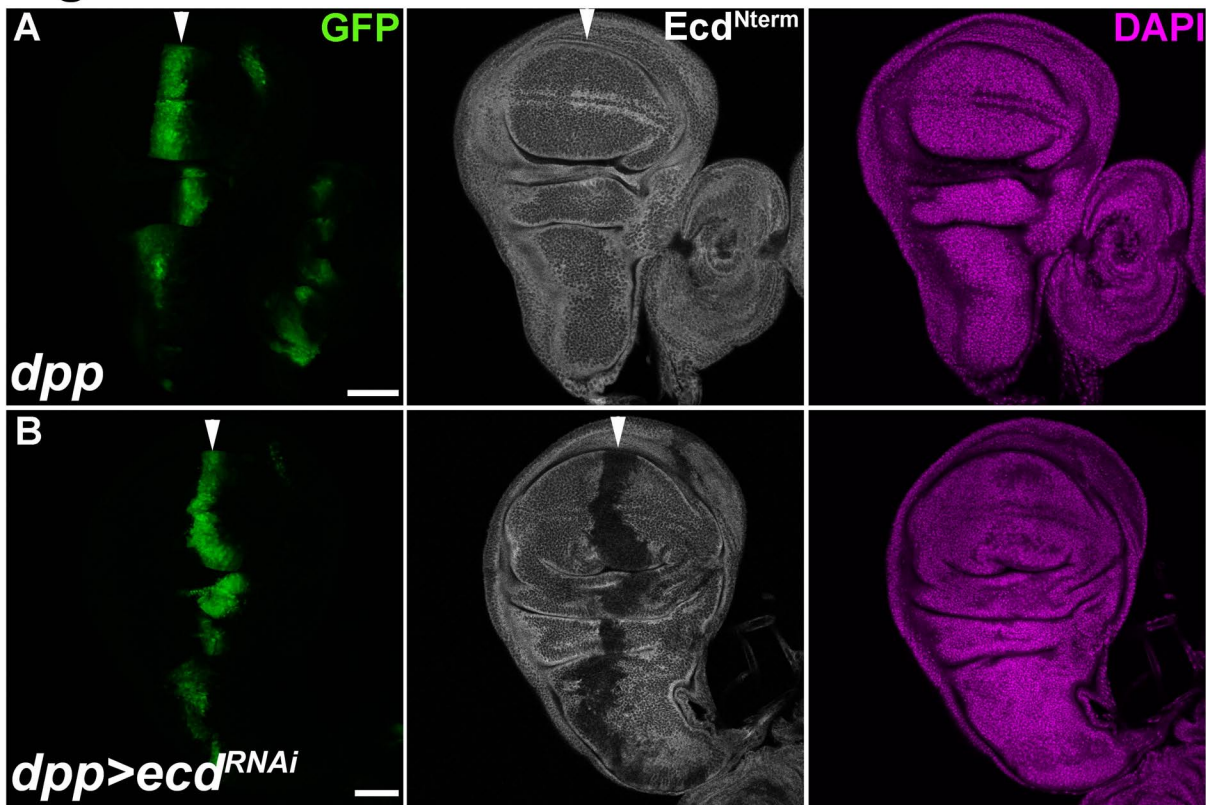

Supplement: pgen.1004287.s002.pdf [file pgen.1004287.s002.pdf]
