# Supplementary material for: Unexpected Role of the Steroid-Deficiency Protein Ecdysoneless in Pre-mRNA Splicing
Source: PubMed Central journal article supplement (PMC3983036; doi:10.1371/journal.pgen.1004287), 2014-04-10
Supplement: pgen.1004287.s008.pdf [file pgen.1004287.s008.pdf]

**Table S1**

|                                             | <b>Forward primers (5'=&gt;3')</b>   | <b>Reverse primers (5'=&gt;3')</b>                                     |
|---------------------------------------------|--------------------------------------|------------------------------------------------------------------------|
|                                             | <b>Expression constructs</b>         |                                                                        |
| <i>ecd<sup>RNAi</sup></i>                   | TTCGGCTTGTAGAGCTTCTTGGGT             | TAATCTAGATTGTGCGCACCAGCAGTATCTGCC<br>TAAGAATTCTTGTGCGCACCAGCAGTATCTGCC |
| <i>prp8</i>                                 | AAATGATCACGATGTCCATTCCGCCGTACATG     | AAAGCGGCCGCGCTTACGCGTACACATCCTCCC                                      |
| <i>snu114</i>                               | AAATGATCACCATGGATTCCGATTTGTACGATGA   | AAAGCGGCCGCGCCTAAAGCGGGTAGTTGATCAGC                                    |
| <i>aar2</i>                                 | AAAGTCGACATGAACAAGGACAACCTCCAGCA     | AAACTCGAGCTAGGCTTCCGGAAGTTTCGAT                                        |
| <i>brr2</i>                                 | CCCGTCTCAGATCCACATGGCGGATGCCGCAGCACG | AAAGCGGCCGCGCCTAATCTGACTCGCTTTTCGCT                                    |
| <i>ecd</i>                                  | AAAGTCGACATGAGCAAGATTCCAGGCAGCA      | ATATATCTGAGTCGGCCGTTTAAAGCGGCCGCTT                                     |
| <i>ecd<sup>/(3)23</sup></i>                 | AAAGTCGACATGAGCAAGATTCCAGGCAGCA      | AAAGCGGCCGCTTAGTAGCTATCCATCATGTTGC                                     |
| <i>ecd<sup>1</sup></i><br>mutagenesis       | TGGCGGCGCAGGTTCTGTATCCAATC           | GATTGGATACAGAACCTGCGCCGCCA                                             |
| <i>ecd<sup>Nterm</sup></i> Ab<br>production | AACATATGTGCGCAGGAGATACAGTCGTGCAT     | AACTCGAGCGGCTTGTAGAGCTTCTTGGGT                                         |
| <i>hEcd</i>                                 | AAAAGCGGCCGCATGGAAGAAACCATGAAGCT     | AAAAGTCGACTTAATTTTTTGTGGCTTACTTGT                                      |
| <i>sgt1</i>                                 | AAAAGCGGCCGCATGAGCAATCTAGGCAATAACATC | AAAACCTCGAGTTGGAGGATATCATAATCTCATCAAAGG                                |
|                                             | <b>qRT-PCR</b>                       |                                                                        |
| <i>rp49</i>                                 | TCCTACCAGCTTCAAGATGAC                | CACGTTGTGCACCAGGAACT                                                   |
| <i>spok</i>                                 | GCTCTTTGGCGGTGATCGAAACAA             | CGCCGAGCTAAATTTCTCCGCTTT                                               |
| <i>spok</i> intron                          | CGAGAATTTGGTTGCCAGCGAAACA            | GCCATCCTCTTAAGGAGTGTGGTCAT                                             |
| <i>spok</i> E11                             | TCACAAGCTCTTTGCCGGTGAT               | TTAAGAGGATGGATCTAGTGGCCC                                               |
| <i>spok</i> E12                             | CTTTCTTCTGCCTGTGAGATA                | ACCTCCGATCTCGGACATCTT                                                  |
| <i>phm</i>                                  | ATTGGCTAAAGGCCTTGGGCATGA             | ATCCCGAAGACCAGGTGCTTGATT                                               |
| <i>phm</i> intron                           | TGGCGCGTATTTACTACTGAACG              | ACGTAGATCCTGAAACCATACGA                                                |
| <i>ecd</i>                                  | ACCCAAGAAGCTCTACAAGCCGAA             | ACCTTTGCTGTGAGTCTGTGGAA                                                |
| <i>EcR<sup>com</sup></i>                    | AAGGCCCAGAAGGAGAAGGACAAA             | TATATTGCGCGCTTGACACTTGGC                                               |
| <i>EcR</i> intron                           | TTAGGGTTCGTGCGCTTTTCGCTTAT           | TTAGGCTAAGGGCTTGCTGTGACT                                               |
| <i>E74<sup>com</sup></i>                    | GGGCACCTTTCTGCATCCGAATTT             | GTGCGTTGAAGTAGGACGTTGTCA                                               |
| <i>E74</i> intron                           | CGGAGGCAACTTTCAATTGCGACA             | TTACACAAGCACGCGAACACACAC                                               |
| <i>α-tub84B</i>                             | TCATAGCCGGCAGTTCGAACGTAT             | ACACCAGCCTGACCAACATGGATA                                               |
